# Supplementary material
Source: PubMed Central journal article supplement (PMC4641572)
Supplement: NIHMS735059-supplement-Suppl_tables.pdf [file NIHMS735059-supplement-Suppl_tables.pdf]

**Table S1. Antibodies used in experiments. Marker column shows the cell surface antigen; 1 denotes BD Pharmingen as the source; 2 denotes eBiosciences. The clone numbers are shown.**

| Marker                    | Clone    |
|---------------------------|----------|
| CD45R/B220 <sup>1,2</sup> | RA3-6B2  |
| CD19 <sup>1</sup>         | 1D3      |
| CD4 <sup>1</sup>          | GK1.5    |
| CD8a <sup>1</sup>         | 53-6.7   |
| Mac1 <sup>1,2</sup>       | M1/70    |
| Gr1 <sup>1,2</sup>        | RB6-8C5  |
| c-kit <sup>1,2</sup>      | ACK2     |
| Sca1 <sup>1</sup>         | D7       |
| Ter 119 <sup>1,2</sup>    | TER-119  |
| CD135 <sup>2</sup>        | A2F10    |
| CD48 <sup>1</sup>         | C7       |
| CD150 <sup>2</sup>        | 9D1      |
| CD21/CD35 <sup>1</sup>    | 7G6      |
| IgM <sup>1</sup>          | R6-60.2  |
| CD23 <sup>1</sup>         | B3B4     |
| CD127 <sup>1,2</sup>      | SB/199   |
| CD44 <sup>1</sup>         | IM7      |
| CD25 <sup>1</sup>         | PC61     |
| CD3e <sup>1</sup>         | 145-2C11 |
| CD45.1 <sup>1</sup>       | A20      |
| CD45.2 <sup>1</sup>       | 104      |
| CD34 <sup>1</sup>         | ram34    |

**Table S2. Cell surface markers defining specific B-cell subsets and stem cell populations.**

| <b>Organ</b>       | <b>B cell compartment</b>       | <b>Surface marker</b>        |
|--------------------|---------------------------------|------------------------------|
| <b>Spleen</b>      | T1 B cells                      | CD19+, IgM+, CD23-,CD21-     |
|                    | T2 B cells                      | CD19+, IgMhi, CD23+, CD21int |
|                    | Follicular B cells              | CD19+, IgMint, CD23+, CD21+  |
|                    | Marginal zone b cells           | CD19+, IgM+, CD23-,CD21+     |
|                    | Marginal zone precursor B cells | CD19+, IgMint, CD23+, CD21hi |
|                    | CD93+ B cells                   | CD19+, IgM+, CD93+           |
|                    | Anergic B cells                 | CD19+, IgMlo, CD93+, CD23lo  |
|                    | Plasma cells                    | CD19+, CD13+                 |
| <b>Bone marrow</b> |                                 |                              |
|                    | Pro B cells                     | B220int, CD43+               |
|                    | Pre B cells                     | B220int, CD25+               |
|                    | Immature B cells                | B220int, IgM+                |
|                    | Recirculating B cells           | B220hi,IgM+                  |
|                    | Plasma cells                    | B220+, CD138hi               |
| <b>Bone marrow</b> |                                 |                              |
|                    | HSC                             | LSK CD34- CD48- CD150+ Flt3- |
|                    | MPP1                            | LSK CD34+ CD48- CD150+ Flt3- |
|                    | MPP2                            | LSK CD34+ CD48+ CD150+ Flt3- |
|                    | MPP3                            | LSK CD34+ CD48+ CD150- Flt3- |
|                    | MPP4                            | LSK CD34+ CD48+ CD150- Flt3+ |
|                    | HSPC or LSK                     | Lineage-Sca1+c-kit+          |

**Table S3. Tgfb1 target genes are enriched in Hhex cKO HSC compared to WT HSC.** Tgfb1 was determined to be an upstream regulator enriched in Hhex cKO versus WT by whole transcriptome data. The differential expression of each target is shown by log<sub>2</sub> ratio. The predicted state of Tgfb1 is determined by the target's up- or downregulation in Hhex cKO HSCs.

| ID                 | Genes in dataset       | Prediction (based on expression direction) | Log Ratio | Findings from literature |
|--------------------|------------------------|--------------------------------------------|-----------|--------------------------|
| ENSMUSG0000005339  | FCER1A                 | Inhibited                                  | 6.094     | Downregulates (1)        |
| ENSMUSG00000091971 | HSPA1A/HSPA1B          | Inhibited                                  | 4.020     | Downregulates (0)        |
| ENSMUSG00000032323 | CYP11A1                | Activated                                  | 3.187     | Upregulates (2)          |
| ENSMUSG00000024680 | MS4A2                  | Inhibited                                  | 3.017     | Downregulates (2)        |
| ENSMUSG00000037759 | PTGER2                 | Activated                                  | 2.766     | Upregulates (3)          |
| ENSMUSG00000020592 | SDC1                   | Activated                                  | 2.578     | Upregulates (2)          |
| ENSMUSG00000007613 | TGFBR1                 | Activated                                  | 2.399     | Upregulates (14)         |
| ENSMUSG00000017950 | HNF4A                  | Inhibited                                  | 2.308     | Downregulates (8)        |
| ENSMUSG00000025804 | CCR1                   | Activated                                  | 2.117     | Upregulates (4)          |
| ENSMUSG00000015437 | GZMB                   | Inhibited                                  | 1.971     | Downregulates (0)        |
| ENSMUSG00000034957 | CEBPA                  | Activated                                  | 1.897     | Upregulates (2)          |
| ENSMUSG00000024190 | DUSP1                  | Activated                                  | 1.835     | Upregulates (2)          |
| ENSMUSG00000041112 | ELMO1                  | Activated                                  | 1.758     | Upregulates (1)          |
| ENSMUSG00000055148 | KLF2                   | Inhibited                                  | 1.719     | Downregulates (1)        |
| ENSMUSG00000054932 | AFP                    | Inhibited                                  | 1.645     | Downregulates (2)        |
| ENSMUSG00000056758 | HMGA2                  | Activated                                  | 1.637     | Upregulates (0)          |
| ENSMUSG00000003032 | KLF4                   | Inhibited                                  | 1.635     | Downregulates (5)        |
| ENSMUSG00000027776 | IL12A                  | Activated                                  | 1.599     | Upregulates (2)          |
| ENSMUSG00000058355 | ABCE1                  | Affected                                   | 1.571     | Regulates (2)            |
| ENSMUSG00000044734 | SERPINB1               | Activated                                  | 1.514     | Upregulates (1)          |
| ENSMUSG00000021701 | PLK2                   | Affected                                   | 1.508     | Regulates (2)            |
| ENSMUSG00000031207 | MSN                    | Activated                                  | 1.487     | Upregulates (1)          |
| ENSMUSG00000021065 | FUT8                   | Activated                                  | 1.475     | Upregulates (1)          |
| ENSMUSG00000024381 | BIN1                   | Affected                                   | 1.433     | Regulates (2)            |
| ENSMUSG00000053931 | CNN3                   | Activated                                  | 1.417     | Upregulates (1)          |
| ENSMUSG00000058587 | TMOD3                  | Activated                                  | 1.394     | Upregulates (1)          |
| ENSMUSG00000049103 | CCR2                   | Activated                                  | 1.389     | Upregulates (0)          |
| ENSMUSG00000024697 | GNA14                  | Inhibited                                  | 1.352     | Downregulates (1)        |
| ENSMUSG00000018930 | CCL4                   | Activated                                  | 1.337     | Upregulates (1)          |
| ENSMUSG00000030830 | ITGAL                  | Inhibited                                  | 1.335     | Downregulates (2)        |
| ENSMUSG00000016494 | CD34                   | Inhibited                                  | 1.277     | Downregulates (7)        |
| ENSMUSG00000056515 | RAB31                  | Activated                                  | 1.262     | Upregulates (1)          |
| ENSMUSG00000035473 | GALM                   | Inhibited                                  | 1.233     | Downregulates (1)        |
| ENSMUSG00000037235 | MXD4                   | Activated                                  | 1.202     | Upregulates (4)          |
| ENSMUSG00000076431 | SOX4                   | Activated                                  | 1.174     | Upregulates (6)          |
| ENSMUSG00000075602 | Ly6a (includes others) | Inhibited                                  | 1.121     | Downregulates (1)        |
| ENSMUSG00000029777 | GARS                   | Activated                                  | 1.079     | Upregulates (1)          |
| ENSMUSG00000049382 | KRT8                   | Activated                                  | -2.354    | Downregulates (3)        |
| ENSMUSG00000037362 | NOV                    | Activated                                  | -2.394    | Downregulates (21)       |
| ENSMUSG00000036905 | C1QB                   | Inhibited                                  | -2.405    | Upregulates (1)          |
| ENSMUSG00000023034 | NR4A1                  | Inhibited                                  | -2.430    | Upregulates (5)          |
| ENSMUSG00000022037 | Clu                    | Inhibited                                  | -2.797    | Upregulates (0)          |

ENSMUSG00000037411  
 ENSMUSG00000040152  
 ENSMUSG00000035936  
 ENSMUSG00000053475  
 ENSMUSG00000029380  
 ENSMUSG00000021091  
 ENSMUSG00000019997  
 ENSMUSG00000022887  
 ENSMUSG00000026077  
 ENSMUSG00000048126  
 ENSMUSG00000005237  
 ENSMUSG00000032561  
 ENSMUSG00000024803  
 ENSMUSG00000003665

|          |           |        |                   |
|----------|-----------|--------|-------------------|
| SERPINE1 | Inhibited | -3.012 | Upregulates (211) |
| THBS1    | Inhibited | -3.142 | Upregulates (13)  |
| ALDH5A1  | Affected  | -3.431 | Regulates (2)     |
| TNFAIP6  | Inhibited | -3.474 | Upregulates (2)   |
| CXCL2    | Inhibited | -3.749 | Upregulates (1)   |
| SERPINA3 | Inhibited | -3.807 | Upregulates (3)   |
| CTGF     | Inhibited | -3.846 | Upregulates (139) |
| Masp1    | Inhibited | -4.977 | Upregulates (1)   |
| NPAS2    | Affected  | -4.990 | Regulates (2)     |
| COL6A3   | Inhibited | -5.083 | Upregulates (4)   |
| DNAH2    | Affected  | -5.240 | Regulates (2)     |
| ACPP     | Inhibited | -5.468 | Upregulates (1)   |
| ANKRD1   | Inhibited | -6.051 | Upregulates (2)   |
| HAS1     | Inhibited | -      | Upregulates (8)   |

**Table S4. Network analysis of pathways enriched in *Hhex* cKO HSC by IPA.** Upstream transcriptional regulators implicated in *Hhex* cKO versus WT were found by comparing whole transcriptome data. The differential expression of each regulator is shown by log<sub>2</sub> ratio. The predicted state of the regulator is determined by the consistency of its targets being up- or downregulated in *Hhex* cKO HSCs. Z score and the P values were generated by the IPA software. The last column shows the regulators' target gene lists.

| Upstream Regulator    | Log <sub>2</sub> Ratio | Predicted State | z-score | P        | Target molecules in dataset                                                                                                                                         |
|-----------------------|------------------------|-----------------|---------|----------|---------------------------------------------------------------------------------------------------------------------------------------------------------------------|
| <i>Hoxa7</i>          | 0.958                  | Activated       | 2.596   | 2.04E-08 | <i>CD34, CD93, DDX4, FLT3, LAT2, SOX4, Tmsb4x</i> (includes others)                                                                                                 |
| <i>E. coli</i> B4 LPS | n/a                    | Activated       | 2.197   | 5.35E-08 | <i>C11orf82, C1QB, CCL4, Cd52, CLEC14A, CXCL2, F5, FLT3, GNA14, HLA-B, Ifi204</i> (includes others), <i>IL12A, LCP1, Ly6a</i> (includes others), <i>RTP4, USP18</i> |
| <i>Runx1</i>          | 0.432                  | Activated       | 2.136   | 1.01E-06 | <i>CD34, CD53, CEBPA, CPA3, CTSG, CYP11A1, GZMB, ITGAL, PF4</i>                                                                                                     |
| <i>Hoxa9</i>          | 0.808                  | Activated       | 2.760   | 3.08E-06 | <i>CD34, CD93, CTSG, DDX4, FCGRT, FLT3, LAT2, RAB31, SOX4, TACC1, Tmsb4x</i> (includes others)                                                                      |
| <i>Ifnb1</i>          | 0.000                  | Activated       | 2.197   | 4.56E-06 | <i>CCL4, CLEC4E, CXCL2, Gbp6</i> (includes others), <i>HMGA2, Ifi204</i> (includes others), <i>IFI27L2, IL12A, THBS1, TLR7, UBA7, UCHL1, USP18</i>                  |

**Table S5. Competitive bone marrow transplantation.** Whole bone marrow was flushed from donor mouse strain (CD45.2) and mixed with B6.Ly5.1 congenic marrow (CD45.1) at various input ratios. The mixed whole bone marrow was intravenously injected into lethally irradiated B6.Ly5.1 congenic host mice. The peripheral blood was analyzed for CD45.1/CD45.2 chimerism at the time points shown post-transplant. Figure 4 in the paper shows the 16 week post-transplant analyses at an input ratio of 6:1. The blank cells in this table show time points that were not analyzed for a given group. The CD45.1/CD45.2 congenic system is established in the field<sup>13-15</sup>.

| donor bone marrow                           | Input ratio<br>(45.1:45.2) | 4 weeks |       | 6 weeks |       | 8 weeks |       | 12 weeks |       |
|---------------------------------------------|----------------------------|---------|-------|---------|-------|---------|-------|----------|-------|
| Hhex cKO (Hhex <sup>lox/lox</sup> ;vav-Cre) |                            | %45.1   | %45.2 | %45.1   | %45.2 | %45.1   | %45.2 | %45.1    | %45.2 |
| Hhex cKO                                    | 1:1                        | 99.01   | 0.99  | 98.69   | 1.3   | 99.87   | 0.13  | 100      | 0     |
| Hhex cKO                                    | 1:1                        | 100     | 0     | 94      | 6     | 100     | 0     | 99.9     | 0.1   |
| Hhex cKO                                    | 1:4                        | 99.64   | 0.36  | 96      | 4     | 99.85   | 0.14  | 100      | 0     |
| Hhex cKO                                    | 1:4                        | 99.77   | 0.23  | 98.45   | 1.55  | 100     | 0     | 100      | 0     |
| Hhex cKO                                    | 1:4                        | 100     | 0     | 99.87   | 0.12  | 99.98   | 0.02  | 100      | 0     |
| Hhex cKO                                    | 1:1                        | 99.66   | 0.34  | 98.9    | 1.05  | 99.66   | 0.33  | 99.8     | 0.2   |
| Hhex cKO                                    | 1:1                        | 99.87   | 0.13  | 96.2    | 3.78  | 99.83   | 0.17  | 100      | 0     |
| Hhex cKO                                    | 1:4                        | 99.72   | 0.28  | 99.95   | 0.05  | 100     | 0     | 100      | 0     |
| Hhex cKO                                    | 1:4                        | 100     | 0     | 99.91   | 0.09  | 100     | 0     | 100      | 0     |
| <b>B6</b>                                   |                            |         |       |         |       |         |       |          |       |
| B6                                          | 1:1                        | 26      | 74    |         |       |         |       | 32.4     | 67.6  |
| B6                                          | 1:4                        | 16      | 84    |         |       |         |       | 8        | 92    |
| <b>Hhex<sup>lox/lox</sup></b>               |                            |         |       |         |       |         |       |          |       |
| Hhex <sup>lox/lox</sup>                     | 1:5                        | 29.4    | 70.6  | 30.6    | 69.4  | 22      | 88    |          |       |
| Hhex <sup>lox/lox</sup>                     | 1:5                        | 36.9    | 63    | 31.2    | 68.8  | 25.5    | 74.5  |          |       |
| Hhex <sup>lox/lox</sup>                     | 1:5                        | 55.1    | 44.9  | 71.2    | 28.8  | 20.7    | 79.3  |          |       |
| Hhex <sup>lox/lox</sup>                     | 1:8                        | 41.9    | 58.1  | 35      | 65    | 31.5    | 68.5  |          |       |
